# Supplementary material for: Higher Expressions of SHH and AR Are Associated with a Positive Receptor Status and Have Impact on Survival in a Cohort of Croatian Breast Cancer Patients
Source: MDPI journal article supplement (doi:10.3390/life12101559), 2022-10-07
Supplement: s1 [file s1]

**Supplemental Table S1.** Association of clinicopathological characteristics of a cohort of Croatian breast cancer patients with molecular subtype and receptor status. Statistically significant *p*-values for chi-square or Fisher's exact test are in bold. Data are presented with a number of samples (percentage of the whole column).

| Characteristic    | Molecular subtype |            |            |            |                   | Receptor status |            |                   |           |            |               |            |           |               |
|-------------------|-------------------|------------|------------|------------|-------------------|-----------------|------------|-------------------|-----------|------------|---------------|------------|-----------|---------------|
|                   | LumA              | LumB       | HER2-E     | TNBC       | <i>p</i>          | ER-             | ER+        | <i>p</i>          | PR-       | PR+        | <i>p</i>      | HER2-      | HER2+     | <i>p</i>      |
| Age               |                   |            |            |            |                   |                 |            |                   |           |            |               |            |           |               |
| ≤50 years         | 7 (14.6)          | 22 (30.1)  | 2 (12.5)   | 15 (31.9)  | 0.096             | 17 (26.6)       | 29 (24.2)  | 0.722             | 21 (26.6) | 25 (23.8)  | 0.668         | 34 (24.1)  | 12 (27.9) | 0.616         |
| >50 years         | 41 (85.4)         | 51 (69.9)  | 14 (87.5)  | 32 (68.1)  |                   | 47 (73.4)       | 91 (75.8)  |                   | 58 (73.4) | 80 (76.2)  |               | 107 (75.9) | 31 (72.1) |               |
| Histotype         |                   |            |            |            |                   |                 |            |                   |           |            |               |            |           |               |
| IDC               | 42 (87.5)         | 55 (74.3)  | 16 (100.0) | 47 (100.0) | <b>0.0002</b>     | 64 (100.0)      | 96 (79.3)  | <b>0.0001</b>     | 76 (96.2) | 84 (79.2)  | <b>0.0009</b> | 123 (86.6) | 37 (86.0) | 0.924         |
| IDC + DCIS        | 6 (12.5)          | 19 (25.7)  | 0 (0.0)    | 0 (0.0)    |                   | 0 (0.0)         | 25 (20.7)  |                   | 3 (3.8)   | 22 (20.8)  |               | 19 (13.4)  | 6 (14.0)  |               |
| Tumor size        |                   |            |            |            |                   |                 |            |                   |           |            |               |            |           |               |
| <2 cm             | 38 (79.2)         | 43 (58.1)  | 7 (43.7)   | 17 (36.2)  | <b>0.0003</b>     | 25 (39.1)       | 80 (66.1)  | <b>0.0004</b>     | 37 (46.8) | 68 (64.2)  | <b>0.019</b>  | 89 (62.7)  | 16 (37.2) | <b>0.003</b>  |
| ≥2 cm             | 10 (20.8)         | 31 (41.9)  | 9 (56.2)   | 30 (63.8)  |                   | 39 (60.9)       | 41 (33.9)  |                   | 42 (53.2) | 38 (35.8)  |               | 53 (37.3)  | 27 (62.8) |               |
| Nodal involvement |                   |            |            |            |                   |                 |            |                   |           |            |               |            |           |               |
| 0-3               | 46 (95.8)         | 60 (82.2)  | 12 (75.0)  | 41 (87.2)  | 0.088             | 54 (84.4)       | 105 (87.5) | 0.557             | 65 (82.3) | 94 (89.5)  | 0.157         | 128 (90.8) | 31 (72.1) | <b>0.002</b>  |
| ≥4                | 2 (4.2)           | 13 (17.8)  | 4 (25.0)   | 6 (12.8)   |                   | 10 (15.6)       | 15 (12.5)  |                   | 14 (17.7) | 11 (10.5)  |               | 13 (9.2)   | 12 (27.9) |               |
| Ki-67             |                   |            |            |            |                   |                 |            |                   |           |            |               |            |           |               |
| <20%              | 48 (100.0)        | 0 (0.0)    | 2 (12.5)   | 3 (6.4)    | <b>&lt;0.0001</b> | 5 (7.8)         | 48 (39.7)  | <b>&lt;0.0001</b> | 12 (15.2) | 41 (38.7)  | <b>0.0005</b> | 50 (35.2)  | 3 (7.0)   | <b>0.0003</b> |
| ≥20%              | 0 (0.0)           | 74 (100.0) | 14 (87.5)  | 44 (93.6)  |                   | 59 (92.2)       | 73 (60.3)  |                   | 67 (84.8) | 65 (61.3)  |               | 92 (64.8)  | 40 (93.0) |               |
| LVI               |                   |            |            |            |                   |                 |            |                   |           |            |               |            |           |               |
| Absent            | 36 (75.0)         | 37 (50.0)  | 11 (68.7)  | 32 (68.1)  | <b>0.029</b>      | 44 (68.7)       | 72 (59.5)  | 0.217             | 55 (69.6) | 61 (57.5)  | 0.094         | 93 (65.5)  | 23 (53.5) | 0.155         |
| Present           | 12 (25.0)         | 37 (50.0)  | 5 (31.2)   | 15 (31.9)  |                   | 20 (31.2)       | 49 (40.5)  |                   | 24 (30.4) | 45 (42.5)  |               | 49 (34.5)  | 20 (46.5) |               |
| Survival          |                   |            |            |            |                   |                 |            |                   |           |            |               |            |           |               |
| Alive             | 36 (75.0)         | 62 (83.8)  | 11 (68.7)  | 31 (66.0)  | 0.140             | 43 (67.2)       | 97 (80.2)  | 0.051             | 55 (69.6) | 85 (80.2)  | 0.098         | 106 (74.6) | 34 (79.1) | 0.555         |
| Deceased          | 12 (25.0)         | 12 (16.2)  | 5 (31.2)   | 16 (34.0)  |                   | 21 (32.8)       | 24 (19.8)  |                   | 24 (30.4) | 21 (19.8)  |               | 36 (25.4)  | 9 (20.9)  |               |
| Recurrence        |                   |            |            |            |                   |                 |            |                   |           |            |               |            |           |               |
| Absent            | 47 (97.9)         | 73 (98.6)  | 15 (93.7)  | 42 (89.4)  | 0.077             | 58 (90.6)       | 119 (98.3) | <b>0.014</b>      | 73 (92.4) | 104 (98.1) | 0.060         | 135 (95.1) | 42 (97.7) | 0.463         |
| Present           | 1 (2.1)           | 1 (1.4)    | 1 (6.2)    | 5 (10.6)   |                   | 6 (9.4)         | 2 (1.7)    |                   | 6 (7.6)   | 2 (1.9)    |               | 7 (4.9)    | 1 (2.3)   |               |
| Metastasis        |                   |            |            |            |                   |                 |            |                   |           |            |               |            |           |               |
| Absent            | 48 (100.0)        | 68 (91.9)  | 14 (87.5)  | 36 (76.6)  | <b>0.002</b>      | 51 (79.7)       | 115 (95.0) | <b>0.001</b>      | 65 (82.3) | 101 (95.3) | <b>0.004</b>  | 127 (89.4) | 39 (90.7) | 0.812         |
| Present           | 0 (0.0)           | 6 (8.1)    | 2 (12.5)   | 11 (23.4)  |                   | 13 (20.3)       | 6 (5.0)    |                   | 14 (17.7) | 5 (4.7)    |               | 15 (10.6)  | 4 (9.3)   |               |

DCIS – ductal carcinoma in situ; HER-2-E – HER-2-enriched; IDS – invasive ductal carcinoma; LumA – luminal A; LumB – luminal B; LVI – lymphovascular invasion; *p* – *p*-value; TNBC – triple-negative breast cancer

**Supplemental Table S2.** Impact of clinicopathological characteristics and sonic hedgehog protein and androgen receptor expressions on different types of survival in a cohort of Croatian breast cancer patients. Presented are *p*-values for log-rank test (statistically significant are in bold).

| Characteristic                  |     | Molecular subtype |              |              |              |              |              | Receptor status |              |              |                   |              |
|---------------------------------|-----|-------------------|--------------|--------------|--------------|--------------|--------------|-----------------|--------------|--------------|-------------------|--------------|
|                                 |     | All               | LumA         | LumB         | HER2-E       | TNBC         | ER-          | ER+             | PR-          | PR+          | HER2-             | HER2+        |
| Age<br>≤50 vs. >50 years        | OS  | <b>0.007</b>      | 0.479        | 0.263        | 0.364        | <b>0.013</b> | <b>0.016</b> | 0.160           | <b>0.037</b> | 0.093        | 0.052             | <b>0.046</b> |
|                                 | RFS | 0.497             | <b>0.022</b> | 0.480        | 0.695        | 0.905        | 0.859        | 0.440           | 0.819        | 0.441        | 0.298             | 0.513        |
|                                 | MFS | 0.300             | N.A.         | 0.925        | 0.578        | 0.076        | 0.098        | 0.635           | 0.269        | 0.775        | 0.660             | 0.195        |
| Histotype<br>IDC vs. IDC + DCIS | OS  | 0.095             | 0.236        | 0.493        | N.A.         | N.A.         | N.A.         | 0.201           | 0.327        | 0.269        | 0.231             | 0.223        |
|                                 | RFS | 0.250             | 0.691        | 0.545        | N.A.         | N.A.         | N.A.         | 0.451           | 0.607        | 0.451        | 0.289             | 0.674        |
|                                 | MFS | 0.077             | N.A.         | N.A.         | N.A.         | N.A.         | N.A.         | 0.221           | 0.424        | 0.264        | 0.120             | 0.404        |
| T<br><2 vs. ≥2 cm               | OS  | <b>0.001</b>      | 0.236        | 0.054        | 0.860        | <b>0.030</b> | <b>0.029</b> | 0.054           | <b>0.010</b> | 0.085        | <b>0.0004</b>     | 0.293        |
|                                 | RFS | 0.193             | 0.588        | 0.440        | 0.350        | 0.386        | 0.203        | 0.334           | 0.091        | 0.308        | 0.192             | 0.414        |
|                                 | MFS | <b>0.0006</b>     | N.A.         | 0.657        | 0.183        | <b>0.038</b> | <b>0.010</b> | 0.353           | <b>0.006</b> | 0.240        | <b>0.001</b>      | 0.106        |
| N<br>0-3 vs. ≥4                 | OS  | <b>0.001</b>      | 0.552        | <b>0.014</b> | 0.268        | <b>0.026</b> | <b>0.026</b> | <b>0.029</b>    | <b>0.006</b> | 0.164        | <b>0.0001</b>     | 0.188        |
|                                 | RFS | 0.934             | 0.827        | 0.673        | 0.617        | 0.476        | 0.802        | 0.625           | 0.884        | 0.645        | 0.479             | 0.564        |
|                                 | MFS | <b>&lt;0.0001</b> | N.A.         | <b>0.028</b> | 0.369        | <b>0.004</b> | <b>0.006</b> | <b>0.003</b>    | <b>0.002</b> | <b>0.029</b> | <b>&lt;0.0001</b> | 0.274        |
| Ki-67<br><20% vs. ≥20%          | OS  | 0.899             | N.A.         | N.A.         | 0.679        | 0.915        | 0.936        | 0.541           | 0.476        | 0.367        | 0.537             | 0.740        |
|                                 | RFS | 0.258             | N.A.         | N.A.         | 0.695        | 0.522        | 0.434        | 0.796           | 0.257        | 0.761        | 0.186             | 0.776        |
|                                 | MFS | <b>0.016</b>      | N.A.         | N.A.         | 0.578        | 0.765        | 0.918        | <b>0.034</b>    | 0.327        | 0.058        | <b>0.012</b>      | 0.571        |
| LVI<br>no vs. yes               | OS  | 0.214             | <b>0.040</b> | 0.512        | 0.355        | 0.896        | 0.702        | 0.095           | 0.578        | 0.120        | 0.547             | 0.115        |
|                                 | RFS | 0.931             | 0.588        | 0.296        | 0.097        | 0.512        | 0.903        | 0.743           | 0.814        | 0.797        | 0.745             | 0.245        |
|                                 | MFS | 0.311             | N.A.         | 0.398        | 0.445        | 0.804        | 0.516        | 0.164           | 0.587        | 0.078        | 0.675             | 0.204        |
| SHH<br>'low' vs. 'high'         | OS  | 0.232             | 0.374        | 0.162        | <b>0.043</b> | 0.074        | <b>0.044</b> | 0.259           | 0.084        | 0.097        | 0.095             | 0.608        |
|                                 | RFS | <b>0.022</b>      | N.A.         | N.A.         | N.A.         | <b>0.024</b> | 0.131        | 0.360           | <b>0.024</b> | 0.361        | <b>0.012</b>      | N.A.         |
|                                 | MFS | 0.187             | N.A.         | 0.069        | 0.063        | <b>0.042</b> | 0.059        | <b>0.044</b>    | <b>0.044</b> | 0.111        | 0.294             | 0.515        |
| AR<br>'low' vs. 'high'          | OS  | 0.193             | 0.171        | 0.079        | 0.110        | <b>0.006</b> | <b>0.022</b> | 0.202           | <b>0.040</b> | 0.212        | 0.075             | <b>0.012</b> |
|                                 | RFS | <b>0.001</b>      | N.A.         | N.A.         | N.A.         | 0.244        | 0.122        | <b>0.045</b>    | <b>0.029</b> | <b>0.042</b> | <b>0.015</b>      | N.A.         |
|                                 | MFS | <b>0.018</b>      | N.A.         | 0.237        | 0.128        | <b>0.008</b> | <b>0.024</b> | 0.163           | <b>0.044</b> | 0.086        | 0.113             | <b>0.034</b> |

AR – androgen receptor; DCIS – ductal carcinoma *in situ*; ER – estrogen receptor; HER-2-E – HER-2-enriched; IDS – invasive ductal carcinoma; LumA – luminal A; LumB – luminal B; LVI – lymphovascular invasion; MFS – metastasis-free survival; N – number of positive lymph nodes; N.A. – no or not enough patients with endpoint or characteristic; OR – overall survival; PR – progesterone receptor; RFS – recurrence-free survival; SHH – sonic hedgehog protein; T – tumor size; TNBC – triple-negative breast cancer

**Supplemental Table S3.** Cox proportional hazards regression model analysis of overall survival. Multivariate analysis was performed only if SHH or AR expression showed statistically significant *p*-value in univariate analysis. Significant *p*-values are in bold.

| Covariate | Categories        | TNBC              |              |                   |              | ER-              |              | PR-              |              |
|-----------|-------------------|-------------------|--------------|-------------------|--------------|------------------|--------------|------------------|--------------|
|           |                   | Univariate        |              | Multivariate      |              | Univariate       |              | Univariate       |              |
|           |                   | HR (95% CI)       | <i>p</i>     | HR (95% CI)       | <i>p</i>     | HR (95% CI)      | <i>p</i>     | HR (95% CI)      | <i>p</i>     |
| Age       | ≤50 vs. >50 years | 8.5 (1.12–64.61)  | <b>0.038</b> | 9.4 (1.23–71.30)  | <b>0.031</b> | 8.0 (1.07–59.84) | <b>0.042</b> | 4.1 (0.97–17.66) | 0.055        |
| T         | <2 vs. ≥2 cm      | 4.5 (1.02–19.77)  | <b>0.047</b> | (-)               | -            | 3.2 (1.06–9.40)  | <b>0.039</b> | 3.2 (1.26–8.00)  | <b>0.014</b> |
| N         | 0-3 vs. ≥4        | 3.4 (1.08–10.83)  | <b>0.036</b> | (-)               | -            | 2.8 (1.09–7.27)  | <b>0.033</b> | 3.1 (1.33–7.33)  | <b>0.009</b> |
| Ki-67     | <20% vs. ≥20%     | 1.1 (0.15–8.46)   | 0.915        | (-)               | -            | 0.9 (0.22–4.06)  | 0.936        | 1.6 (0.46–5.21)  | 0.480        |
| LVI       | no vs. yes        | 0.9 (0.32–2.68)   | 0.896        | (-)               | -            | 1.2 (0.48–2.96)  | 0.703        | 1.27 (0.54–2.97) | 0.579        |
| SHH       | ‘low’ vs. ‘high’  | 5.2 (0.69–39.78)  | 0.110        | (-)               | -            | 2.4 (1.00–5.56)  | 0.051        | 4.9 (0.66–36.50) | 0.119        |
| AR        | ‘low’ vs. ‘high’  | 10.0 (1.31–75.99) | <b>0.026</b> | 10.9 (1.43–83.67) | <b>0.021</b> | 7.6 (0.98–54.82) | 0.052        | 6.2 (0.84–46.10) | 0.074        |

AR – androgen receptor; CI – confidence interval; ER – estrogen receptor; HR – hazard ratio; LVI – lymphovascular invasion; N – number of positive lymph nodes; *p* – *p*-value; PR – progesterone receptor; SHH – sonic hedgehog protein; T – tumor size; TNBC – triple-negative breast cancer

**Supplemental Table S4.** Cox proportional hazards regression model analysis of metastasis-free survival. Multivariate analysis was performed only if SHH or AR expression showed statistically significant *p*-value in univariate analysis. Significant *p*-values are in bold.

| Covariate | Categories        | All patients      |               |                  |              | TNBC                               |              | ER-                                |              |
|-----------|-------------------|-------------------|---------------|------------------|--------------|------------------------------------|--------------|------------------------------------|--------------|
|           |                   | Univariate        |               | Multivariate     |              | Univariate                         |              | Univariate                         |              |
|           |                   | HR (95% CI)       | <i>p</i>      | HR (95% CI)      | <i>p</i>     | HR (95% CI)                        | <i>p</i>     | HR (95% CI)                        | <i>p</i>     |
| Age       | ≤50 vs. >50 years | 1.9 (0.57–6.66)   | 0.292         | -(-)             | -            | 5.3 (0.67–41.25)                   | 0.113        | 4.8 (0.62–36.68)                   | 0.134        |
| T         | <2 vs. ≥2 cm      | 5.5 (1.83–16.66)  | <b>0.002</b>  | 4.4 (1.44–13.54) | <b>0.010</b> | 6.6 (0.85–51.80)                   | 0.072        | 9.1 (1.19–70.24)                   | <b>0.034</b> |
| N         | 0-3 vs. ≥4        | 5.6 (2.26–13.99)  | <b>0.0002</b> | 4.2 (1.64–10.56) | <b>0.003</b> | 5.2 (1.52–18.07)                   | <b>0.009</b> | 4.2 (1.37–12.92)                   | <b>0.012</b> |
| Ki-67     | <20% vs. ≥20%     | 8.00 (1.06–59.83) | <b>0.043</b>  | -(-)             | -            | 0.7 (0.09–5.73)                    | 0.766        | 1.1 (0.14–8.55)                    | 0.918        |
| LVI       | no vs. yes        | 1.6 (0.64–3.90)   | 0.315         | -(-)             | -            | 1.2 (0.34–3.99)                    | 0.804        | 1.5 (0.47–4.42)                    | 0.518        |
| SHH       | ‘low’ vs. ‘high’  | 0.54 (0.21–1.37)  | 0.194         | -(-)             | -            | 3.7 (0.96–13.83)                   | 0.057        | 2.7 (0.92–8.16)                    | 0.070        |
| AR        | ‘low’ vs. ‘high’  | 0.3 (0.12–0.86)   | <b>0.024</b>  | -(-)             | -            | 1.3E+06 (5.45E-218–<br>32.27E+228) | 0.957        | 1.1E+06 (3.26E-233–<br>36.37E+243) | 0.960        |

  

| Covariate | Categories        | ER+                                 |              | PR-                               |              |
|-----------|-------------------|-------------------------------------|--------------|-----------------------------------|--------------|
|           |                   | Univariate                          |              | Univariate                        |              |
|           |                   | HR (95% CI)                         | <i>p</i>     | HR (95% CI)                       | <i>p</i>     |
| Age       | ≤50 vs. >50 years | 0.7 (0.13–3.74)                     | 0.661        | 2.3 (0.51–10.16)                  | 0.282        |
| T         | <2 vs. ≥2 cm      | 2.1 (0.42–10.40)                    | 0.365        | 6.2 (1.39–27.84)                  | <b>0.017</b> |
| N         | 0-3 vs. ≥4        | 7.9 (1.60–39.36)                    | <b>0.011</b> | 4.5 (1.56–13.07)                  | <b>0.006</b> |
| Ki-67     | <20% vs. ≥20%     | 5.32E+05 (2.77E-<br>172–1.022E+183) | 0.950        | 2.7 (0.35–20.31)                  | 0.346        |
| LVI       | no vs. yes        | 3.1 (0.58–17.10)                    | 0.188        | 1.4 (0.45–4.04)                   | 0.589        |
| SHH       | ‘low’ vs. ‘high’  | 0.2 (0.02–1.28)                     | 0.083        | 3.1 (0.97–9.91)                   | 0.056        |
| AR        | ‘low’ vs. ‘high’  | 0.3 (0.07–1.68)                     | 0.185        | 9.9E+05 (5.46E-<br>250–1.81E+261) | 0.963        |

AR – androgen receptor; CI – confidence interval; ER – estrogen receptor; HR – hazard ratio; LVI – lymphovascular invasion; N – number of positive lymph nodes; *p* – *p*-value; PR – progesterone receptor; SHH – sonic hedgehog protein; T – tumor size; TNBC – triple-negative breast cancer
